# Supplementary material for: Development, Characterization and Stability Evaluation of Topical Gel Loaded With Ethosomes Containing Achillea millefolium L. Extract
Source: PubMed Central journal article supplement (PMC8074965; doi:10.3389/fphar.2021.603227), 2021-04-12
Supplement: datasheet1.pdf [file datasheet1.pdf]

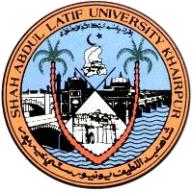

**CBC/SALU/Khp.482, Dated: Tuesday, 12 March 2019**

With reference to information sent by Dr Haji Muhammad Shoaib, Assistant Professor, Department of Pharmacy, Islamia University, Bahawalpur. The nine plant species are verified & identified with the help of different floras and collection available in Herbarium of Centre for Biodiversity and Conservation, SALU. However, the final floral accession number will be allotted after preparation of herbarium specimen.

**Plant species**

1. Botanical Name: *Achillea millefolium* L.  
Common name: Barijasif  
Family: Asteraceae
2. Botanical Name: *Butea superba* Roxb.  
Common name Gultaissu  
Family: Fabaceae
3. Botanical Name: *Citrullus lanatus* (thumb.) Matsum. & Nakai  
Common name: Tarbuz  
Family: Cucurbitaceae
4. Botanical name: *Myrciaria dubia* (Kunth) Mc vaugh  
Common name: camu camu  
Family: Myrtaceae
5. Botanical name: *Berberis vulgaris* L.  
Common name: barberry  
Family: Berberidaceae
6. Botanical name: *Arctostaphylos uva-ursi* (L.) Spreng.  
Common name: kinnikinnick  
Family: Ericaceae
7. Botanical name: *Benincasa hispida* (Thunb.) Cogn.  
Common name: White Gourd  
Family: Cucurbitaceae
8. Botanical name: *Ocimum tenuiflorum* L.  
Common name: Tulsi  
Family: Lamiaceae
9. Botanical name: *Momordica charantia* L.  
Common name: Bitter melon  
Family: Cucurbitaceae

**Dr. Mumtaz Ali Saand**  
Incharge / Director  
Centre for Biodiversity & Conservation,  
SALU, Khairpur (Mir's)
